# Supplementary material
Source: MDPI journal article supplement (https://www.mdpi.com/2072-4292/14/18/4492)
Supplement: s1 [file s1]

## Supplement SA1

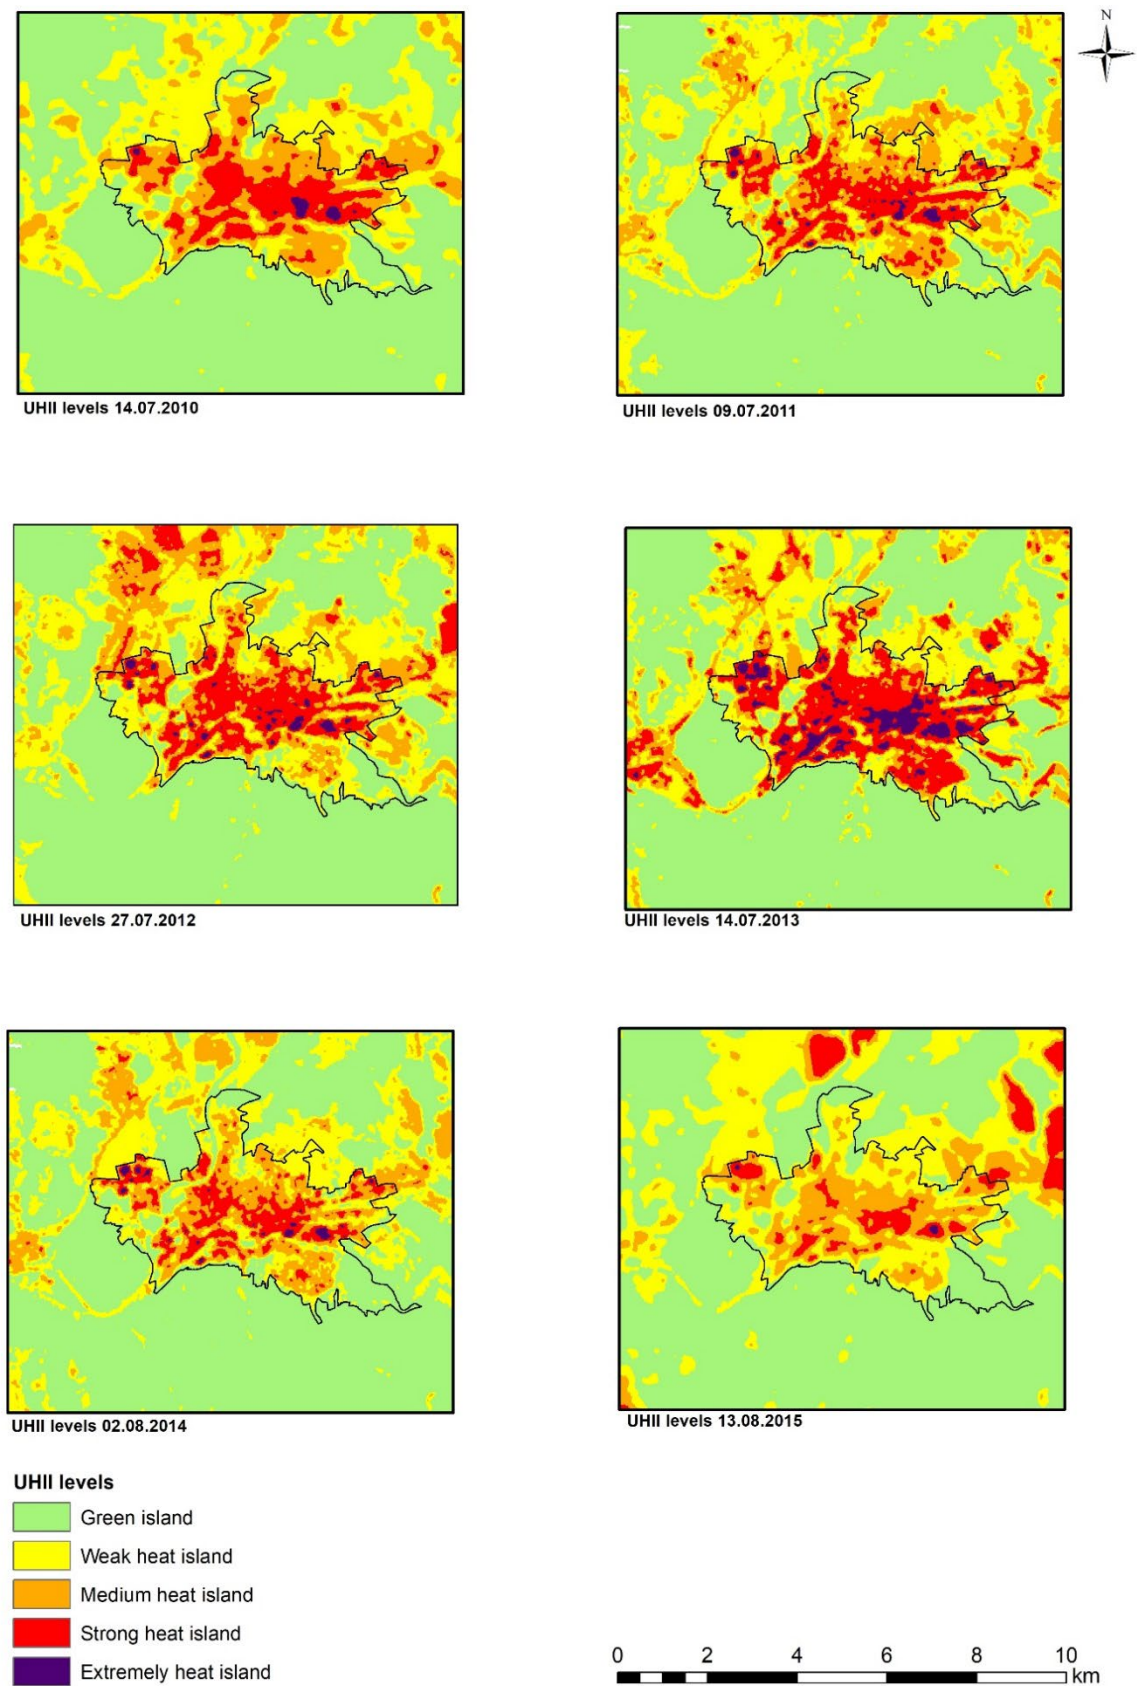

Figure SA1. Space surface Urban Heat Island Intensity in the years 2010–2015.

## Supplement SA2

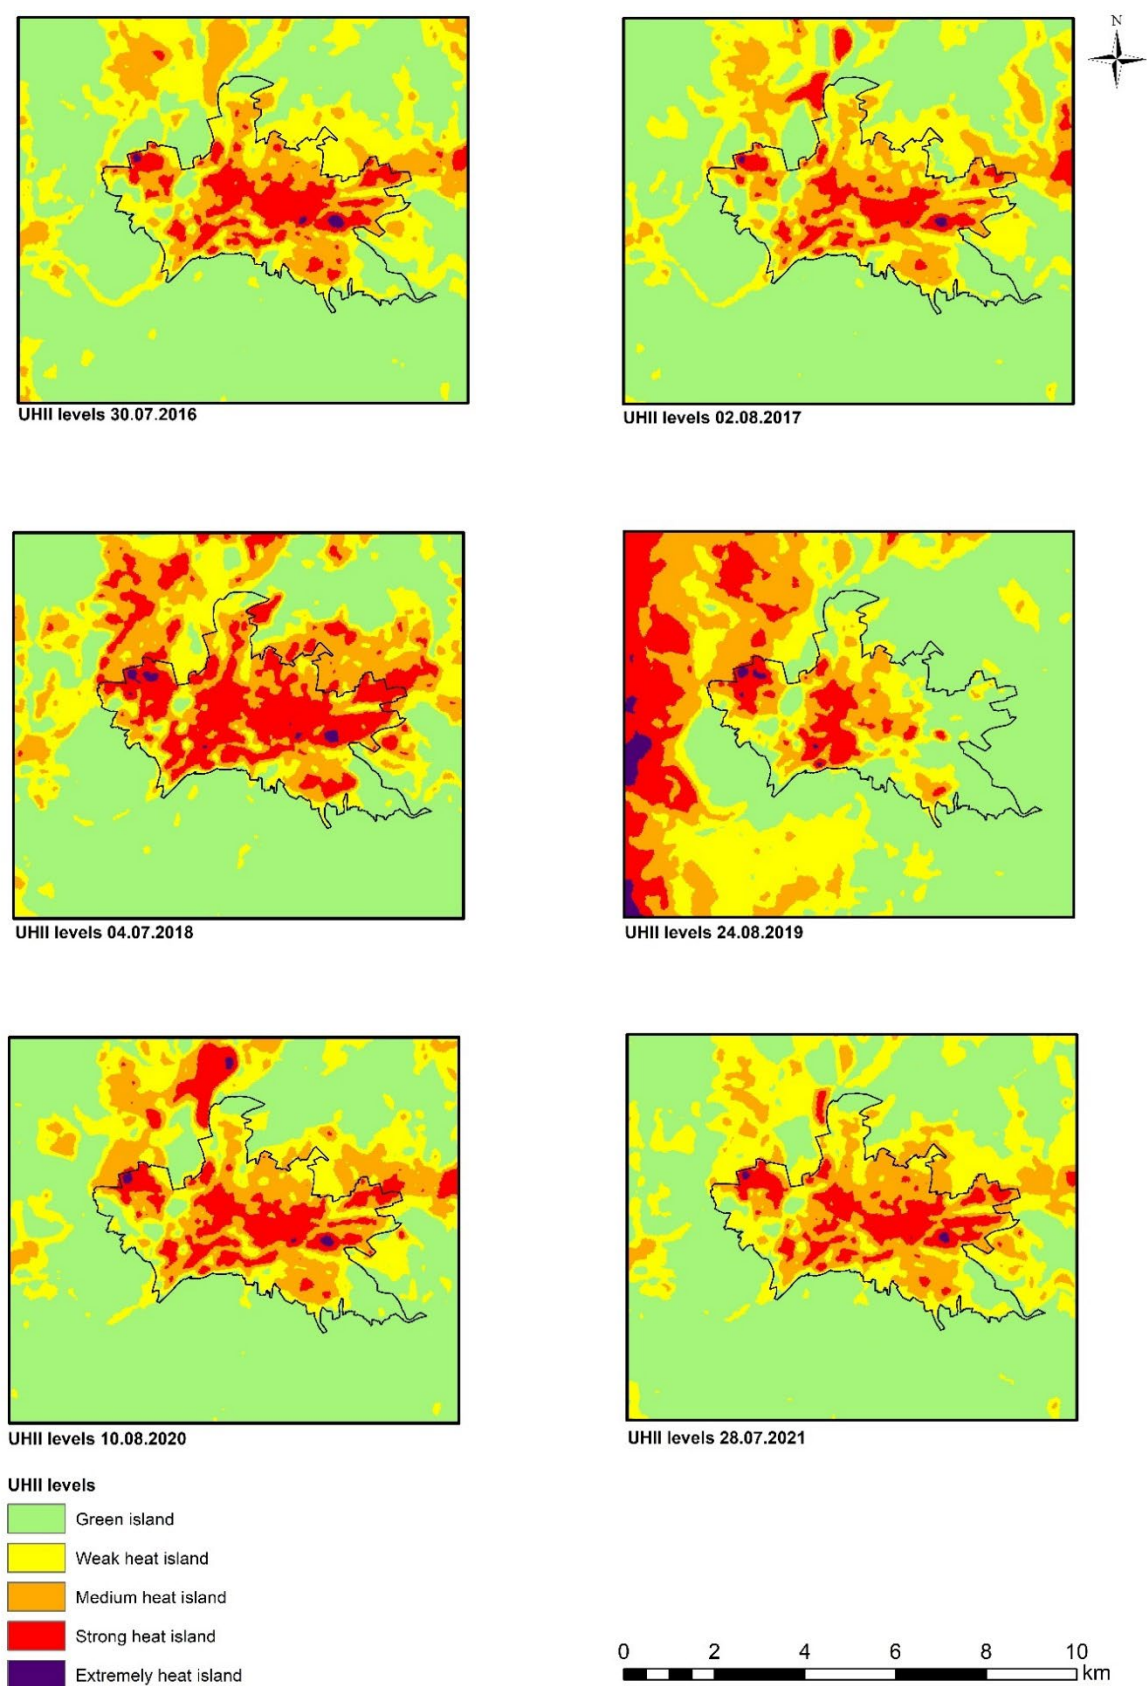

Figure SA2. Space surface Urban Heat Island Intensity in the years 2016–2021.

## Supplement SB1

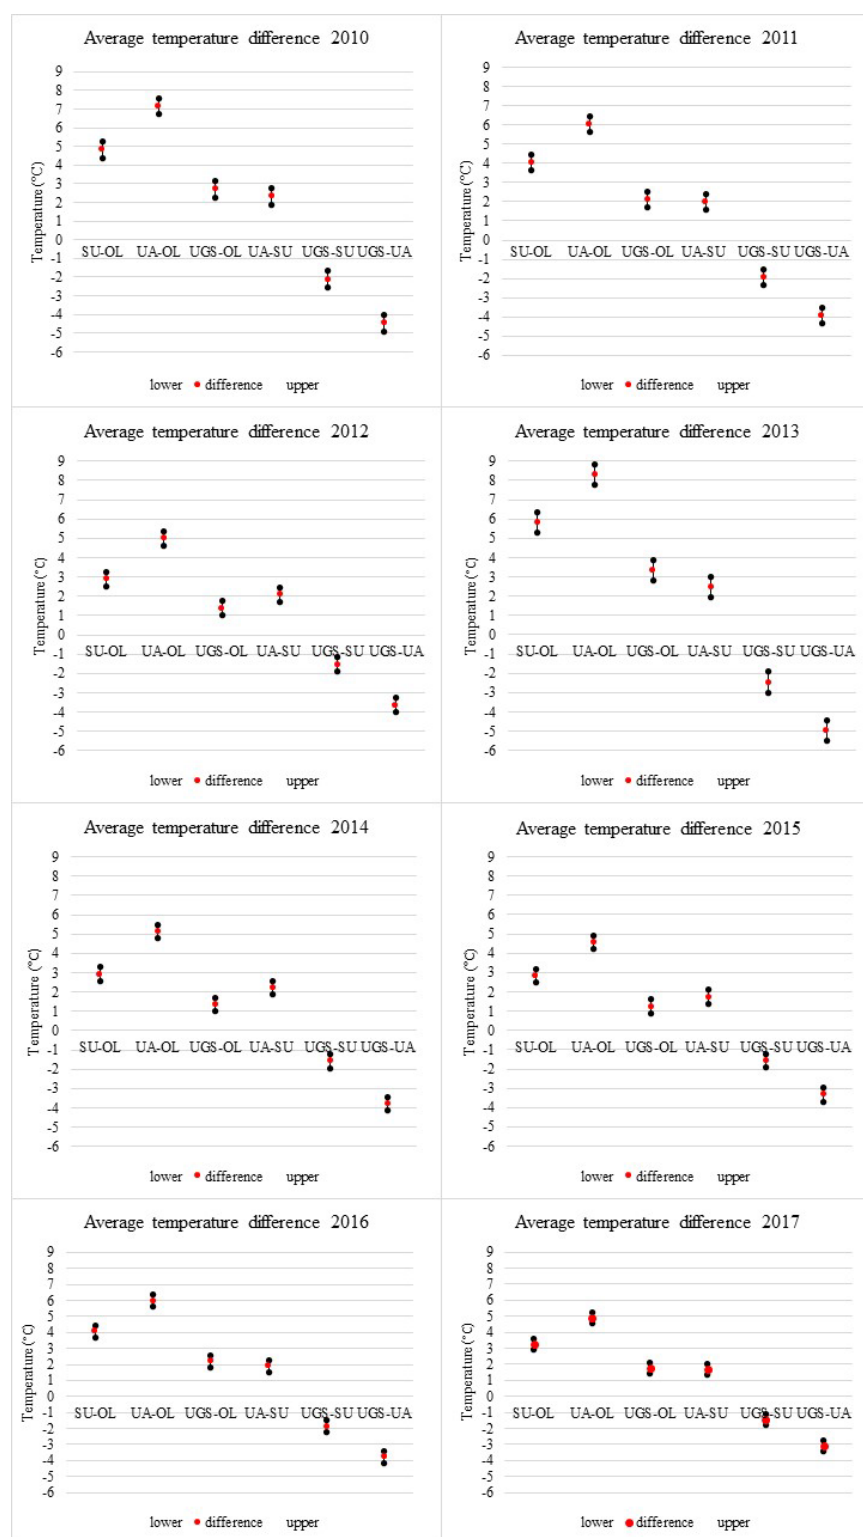

Figure SB1. Comparison of average LST differences between pairs of zones and their 95% family-wise confidence level in the territory within individual days for the years 2010–2017. OL - open land (0 % impervious surfaces), UA - dense urban area (31–100 % impervious surfaces), SU - discontinuous urban area (1–30 % impervious surfaces), UGS - urban green spaces (0 % impervious surfaces)

## Supplement SB2

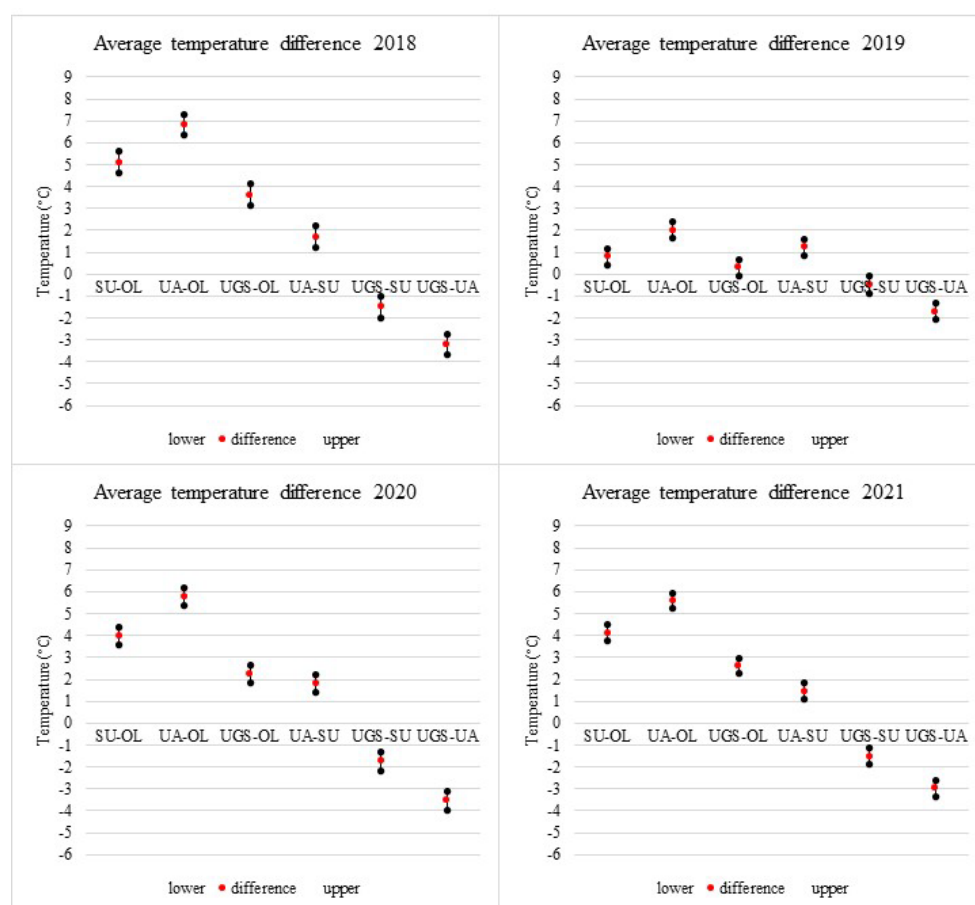

Figure SB2. Comparison of average LST differences between pairs of zones and their 95% family-wise confidence level in the territory within individual days for the years 2018–2021. OL - open land (0 % impervious surfaces), UA - dense urban area (31–100 % impervious surfaces), SU - discontinuous urban area (1–30 % impervious surfaces), UGS - urban green spaces (0 % impervious surfaces)

## Supplement SC1

Table SC1. Average LST differences (in °C) between pairs of zones.

| Zones  | 2010  | 2011  | 2012  | 2013  | 2014  | 2015  | 2016  | 2017  | 2018  | 2019  | 2020  | 2021  |
|--------|-------|-------|-------|-------|-------|-------|-------|-------|-------|-------|-------|-------|
| SU-OL  | 4.82  | 4.04  | 2.90  | 5.81  | 2.93  | 2.83  | 4.06  | 3.25  | 5.11  | 0.80  | 4.00  | 4.14  |
| UA-OL  | 7.15  | 6.04  | 5.00  | 8.30  | 5.15  | 4.57  | 5.97  | 4.91  | 6.82  | 2.02  | 5.80  | 5.59  |
| UGS-OL | 2.71  | 2.13  | 1.38  | 3.37  | 1.35  | 1.25  | 2.19  | 1.80  | 3.62  | 0.31  | 2.26  | 2.62  |
| UA-SU  | 2.34  | 2.00  | 2.11  | 2.49  | 2.22  | 1.74  | 1.92  | 1.66  | 1.71  | 1.22  | 1.80  | 1.45  |
| UGS-SU | -2.11 | -1.92 | -1.52 | -2.45 | -1.59 | -1.58 | -1.86 | -1.45 | -1.49 | -0.48 | -1.74 | -1.52 |
| UGS-UA | -4.44 | -3.91 | -3.62 | -4.94 | -3.80 | -3.32 | -3.78 | -3.11 | -3.20 | -1.71 | -3.54 | -2.97 |

OL - open land (0 % impervious surfaces), UA - dense urban area (31–100 % impervious surfaces), SU - discontinuous urban area (1–30 % impervious surfaces), UGS - urban green spaces (0 % impervious surfaces)

Pairs are highlighted in gray in cases where, in the context of the accuracy of LST determination using the Mono-window algorithm, the difference (taking into account the 95% family-wise confidence level of LST differences between pairs of zones, see Supplement SB) may not be statistically significant.
